# Supplementary material
Source: publisher figshare collection journal article supplement (https://gsapubs.figshare.com/ndownloader/files/22409787)
Supplement: Supplementary file 1 [file 22409787]

## Sheet: Garnet P12055
SAMPLE	SiO2	TiO2	Al2O3	Cr2O3	FeO	MnO	MgO	CaO	Na2O	K2O	O	TOTAL	Core/rim/intermediate
P055_G1.10	37.6448	0.00337433	21.2145	0.0209033	30.2507	1.74306	4.7956	4.19216	-0.00430533	-0.00181733	0	99.859	C
P055_G1.9	37.8214	0.0249307	21.2002	0.000758	30.0581	1.51243	4.8083	4.60293	-0.00299733	-0.001312	1.33333e-06	100.025	C
P055_G1.8	37.728	0.040354	21.1066	-0.0147067	30.2203	0.990918	4.5812	5.23338	0.001957	-0.02223	1.33333e-06	99.8657	C
P055_G1.7	37.9582	0.0476737	21.2362	0.014941	30.5402	0.759835	4.55115	5.14764	0.0224817	-0.001164	-5.33333e-06	100.277	Int
P055_G1.6	37.7503	0.0250217	21.2457	0.001907	30.2185	0.996705	4.61428	5.11837	0.00912333	0.000867667	1.33333e-06	99.9807	Int
P055_G1.5	37.7715	0.018997	21.1116	0.00859333	30.2206	1.51848	4.6865	4.60907	0.003029	-0.00125467	-6.66667e-07	99.9471	Int
P055_G1.4	37.7494	0.00589133	21.2909	0.00794133	30.2257	1.57346	4.74021	4.447	-0.002092	0.00705333	4e-06	100.046	Int
P055_G1.3	37.859	0.014775	21.4444	0.0169193	30.0203	1.12748	5.00448	4.77698	0.0133147	-7.03333e-05	1.33333e-06	100.278	Int
P055_G1.2	37.8118	0.0330553	21.379	0.027094	29.9448	1.06466	4.94659	4.77189	-0.000635	0.00921067	2.66667e-06	99.9875	R
P055_G1.1	37.5481	0.0424957	21.2212	0.0346187	30.6189	2.0417	3.96925	4.55344	0.010872	0.00191167	0	100.043	R
P055_G1.11	37.8848	0.0203227	21.2026	0.028853	30.0302	1.37286	4.90514	4.63626	0.007351	-0.0201267	1.33333e-06	100.068	C
P055_G1.12	37.676	0.0423203	21.172	0.00742033	29.8987	1.61226	4.63395	4.76295	0.0108433	-0.001582	0	99.8148	C
P055_G1.13	37.6789	0.0178533	21.1747	0.03115	29.9	1.78957	4.63563	4.76147	0.00125833	-0.0147567	1.33333e-06	99.9757	Int
P055_G1.14	37.7208	0.035171	21.2691	0.0169113	30.2416	1.43185	4.56384	4.44445	0.00632833	0.008235	1.33333e-06	99.7383	Int
P055_G1.15	37.9265	0.007074	21.3796	0.0179473	29.9572	1.42943	4.68588	4.94656	0.00297733	-0.00540033	0	100.348	Int
P055_G1.16	37.8154	-0.052755	21.2694	0.0101573	29.9727	2.07978	4.71005	4.73914	-0.00471667	0.007572	0	100.547	Int
P055_G1.17	37.6932	-0.00434933	21.2253	0.025863	30.4215	2.0293	4.24055	4.40371	0.00353267	0.00377133	1.33333e-06	100.042	Int
P055_G1.18	37.7648	0.0181433	21.1403	0.0253243	30.3651	1.29759	4.45088	4.1054	0.00729533	-0.00419833	1.33333e-06	99.1707	R
P055_G1.19	37.8177	0.025548	21.2604	0.0196723	29.8792	1.53343	4.8871	4.7801	-0.000869333	-0.00352633	0	100.199	R
P055_G1.20	37.8572	-0.009305	21.1645	0.00464233	29.8044	2.3034	4.63696	4.88785	-0.002317	-0.002275	0	100.645	R
P055_G1.21	37.5772	0.037613	21.1882	0.0138607	30.7786	1.20852	3.81051	4.34783	0.00317967	0.00485633	2.66667e-06	98.9704	Int
P055_G1.22	37.8909	0.0204983	21.3709	0.00458067	30.1131	2.048	4.63459	5.08677	0.017283	-0.00591667	1.33333e-06	101.181	R
P055_G1.23	37.8302	0.022118	21.048	0.000991	30.5729	2.11414	4.57976	3.93896	0.00993733	0.00284633	2.66667e-06	100.12	R
P055_G2.1	37.6053	0.027766	21.2001	0.002442	30.6938	2.19169	4.47157	3.93449	0.00539333	0.0159747	0	100.149	R
P055_G2.2	37.5844	0.027842	21.0307	0.000273333	31.2079	2.04637	4.12902	3.80221	0.00564333	-0.01129	2.66667e-06	99.8231	C
P055_G2.3	37.7113	0.0291803	21.0969	0.014395	30.2838	2.22215	4.49753	4.537	-0.000386667	-0.003017	0	100.389	Int
P055_G2.4	37.4681	0.00202833	21.0097	0.0159043	31.2152	2.23925	4.10148	3.92459	0.005734	-0.00538267	1.33333e-06	99.9766	Int
P055_G2.5	37.5386	0.010459	20.9588	0.0334683	31.1201	2.08716	4.19436	3.84933	0.0167107	0.00520633	1.33333e-06	99.8142	C
P055_G2.6	37.847	0.00976433	21.1457	0.0269503	30.6201	2.18719	4.60876	4.00638	0.0121343	-0.00641333	1.33333e-06	100.458	R
P055_G3.1	37.7496	-0.00252867	21.1456	0.013507	30.7548	2.2076	4.39476	3.96369	0.0124253	-0.006069	2.66667e-06	100.233	R
P055_G3.2	37.4628	-0.00110033	21.3806	-0.011129	31.1584	2.09585	3.91176	4.0159	0.004751	0.00537633	2.66667e-06	100.023	C
P055_G3.3	37.6275	0.0104237	21.324	-0.00548733	30.6229	2.18499	4.23025	4.28957	-0.00468633	-0.00693333	-2e-06	100.273	C
P055_G3.4	37.6025	0.0142063	21.1826	0.00837767	31.0087	2.14568	3.99905	4.19677	0.0148783	0.0151047	0	100.188	R
P055_G4.1	37.4315	-0.012816	21.1693	-0.00547667	31.0091	2.15019	3.62617	4.64805	0.003563	-0.000646	1.33333e-06	100.019	C
P055_G4.2	37.8459	-0.00982067	21.2402	0.024875	30.8225	2.26925	4.53803	3.92269	0.009505	0.00774167	-3.33333e-06	100.671	R
P055_G5.1	37.6387	0.00861533	21.1148	0.0209163	31.3078	2.19921	4.09966	3.86264	0.0112787	-0.000319667	0	100.263	C
P055_G5.2	37.5673	-0.000364333	21.0459	0.0210643	31.103	2.3063	4.22691	3.87009	0.009164	0.0102963	1.33333e-06	100.16	R
P055_G6.1	37.6295	0.011363	21.1286	0.015677	31.3205	2.21792	4.01893	3.76643	0.00798	0.002142	0	100.119	C
P055_G6.2	37.6435	0.0228923	21.0886	0.024205	31.1903	2.25267	4.29612	3.86518	0.015909	-0.00359633	0	100.396	R
P055_G7.1	37.7068	0.0209355	21.3269	0.0175785	31.1528	2.24947	4.25976	3.71347	-0.0045655	-0.01067	-5e-06	100.432	C
P055_G7.2	37.7807	0.003173	21.4207	0.006137	31.0823	2.28422	4.30251	3.95795	0.003257	0.00231767	1.33333e-06	100.843	R

## Sheet: Garnet P12058
SAMPLE	SiO2	TiO2	Al2O3	Cr2O3	FeO	MnO	MgO	CaO	Na2O	K2O	O	TOTAL	Core/rim/intermediate
P058_G1.1	37.9218	0.0145	21.4973	0.013254	32.6189	1.52345	5.84071	0.983098	0.013415	-0.00556667	2.66667e-06	100.421	C
P058_G1.2	38.0722	-0.0249167	21.6006	-0.000192333	32.6527	1.48069	5.97286	0.973036	0.013349	0.00764433	1.33333e-06	100.748	C
P058_G1.3	38.0792	0.00791367	21.5025	0.0163947	32.4717	1.41283	6.01041	1.0875	0.0256723	-0.004017	1.33333e-06	100.61	C
P058_G1.4	38.1021	0.00331267	21.4609	0.0144143	32.6224	1.32271	6.09126	0.954212	0.0161173	-0.004957	1.33333e-06	100.582	Int
P058_G1.5	37.964	-0.001387	21.4242	0.011178	32.9504	1.39171	5.95971	0.837426	0.0211477	0.00536367	1.33333e-06	100.564	Int
P058_G1.6	37.9162	0.00681	21.3476	0.0318163	33.0156	1.4846	5.82089	0.84332	0.0302743	0.0210953	-6.66667e-07	100.518	Int
P058_G1.7	37.9698	0.025165	21.2522	0.00454133	33.2384	1.71284	5.56735	0.787361	0.0224443	-0.000769	-2e-06	100.579	R
P058_G1.8	37.7888	-0.00872167	21.2773	0.00137733	33.1869	1.86247	5.44639	0.769575	0.0583423	-0.000141667	0	100.382	R
P058_G1.9	38.0967	-0.000213667	21.383	0.0129857	32.8412	1.42833	5.84749	1.00849	0.0203707	-0.006321	0	100.632	C
P058_G1.10	37.9743	0.0325357	21.1558	0.00913967	32.9389	1.50859	5.65885	0.641169	0.0113397	-0.002275	-3.33333e-06	99.9284	C
P058_G1.11	37.9596	0.004375	21.38	0.0101403	33.0475	1.56474	5.64998	0.976709	0.011524	-0.002501	2.66667e-06	100.602	Int
P058_G1.12	37.7404	0.00225667	21.285	-0.00547733	33.3161	1.8149	5.30371	0.961736	0.0163327	0.000245333	0	100.435	R
P058_G2.1	37.2657	0.0237313	20.7856	0.000948667	28.6193	5.84724	1.46147	6.3983	0.0315683	-0.00532033	1.33333e-06	100.429	C
P058_G2.2	37.3266	0.0491583	20.8144	0.05588	29.7392	4.93643	2.06116	5.5403	0.0192617	0.000502333	0	100.543	C
P058_G2.3	37.4204	0.0136093	20.8492	0.02456	30.2606	4.34239	2.52029	4.90748	0.0114493	-0.014	1.33333e-06	100.336	C
P058_G2.4	37.9249	0.0216153	21.2438	0.002748	31.5217	2.26395	4.41857	3.13587	0.037722	-0.0148567	2.66667e-06	100.556	Int
P058_G2.5	37.9405	-0.004084	21.3926	0.00907767	32.5489	1.72419	5.30784	1.56391	0.0252493	0.00307933	1.33333e-06	100.511	Int
P058_G2.6	37.9623	0.024799	21.4274	0.01837	33.036	1.40046	5.85797	0.936153	0.0235063	-0.00951333	2.66667e-06	100.677	R
P058_G2.7	37.5595	0.002049	21.2734	0.0228373	33.7815	2.00755	4.8615	0.861746	0.0283363	-0.000921	1.33333e-06	100.398	R
P058_G2.8	37.3906	0.0422103	20.8811	0.0280047	28.9235	5.39487	1.85229	6.1078	0.00483267	-0.002903	0	100.622	C
P058_G2.9	37.4787	0.025285	21.124	0.00875333	30.2346	4.40061	2.70344	4.6819	0.0180287	-0.0128767	0	100.662	C
P058_G2.10	37.5849	0.007192	21.171	0.024049	31.8458	3.05552	3.86197	3.0247	0.016105	-0.00352667	1.33333e-06	100.588	C
P058_G2.11	37.6781	-0.00371	21.2716	0.009295	32.7272	2.03794	4.60189	2.19418	-0.000139333	-0.0132867	0	100.503	Int
P058_G2.12	37.7228	0.00187333	21.4268	0.008531	32.5416	1.59137	5.16341	1.92047	0.0158343	0.005774	0	100.398	Int
P058_G2.13	38.0155	0.00314133	21.6205	-0.000809667	33.19	0.931862	5.99563	1.01203	0.028684	-0.00127533	0	100.795	Int
P058_G2.14	38.0427	-0.00620167	21.6765	0.0124517	33.2673	0.649035	6.36655	0.703517	0.0404387	0.00148567	1.33333e-06	100.754	R
P058_G2.15	37.8252	0.006384	21.6005	-0.00134933	33.1763	0.889919	6.19914	0.643894	0.0224757	-0.00409	0	100.358	R
P058_G2.16	37.8903	0.01693	21.5252	0.0204713	32.9369	1.62073	5.62474	0.947393	0.0183993	0.00809933	1.33333e-06	100.609	R
P058_G3.1	37.5256	0.00995667	21.1859	0.0247293	31.9082	2.54784	4.37767	2.47954	0.024024	-0.00268467	1.33333e-06	100.081	C
P058_G3.2	37.5866	0.00674933	21.1821	0.012285	31.9488	2.37556	4.48668	2.40492	0.0379913	-0.001072	0	100.041	C
P058_G3.3	37.6592	0.0221113	21.407	0.0195783	32.3523	2.17398	4.7928	1.89333	0.0282067	0.00884033	2.66667e-06	100.357	C
P058_G3.4	37.7537	0.014532	21.3876	0.0217823	32.7059	1.91288	5.0645	0.95903	0.024478	-0.00194067	1.33333e-06	99.8425	Int
P058_G3.5	37.8339	-0.000639	21.5084	0.004913	32.9212	1.44494	5.69239	1.04311	0.0197507	0.000683667	1.33333e-06	100.469	Int
P058_G3.6	38.0085	0.007798	21.5821	-0.00603267	33.0428	0.980524	6.16041	0.832596	0.04228	-0.00531767	2.66667e-06	100.646	Int
P058_G3.7	37.9092	0.00800633	21.5624	0.0365683	33.182	1.1921	5.93925	0.692313	0.0336437	0.00278433	0	100.558	R
P058_G3.8	37.7922	-0.00469233	21.4119	0.00190867	33.9302	2.08046	4.72294	0.769446	0.0276303	-0.001728	-3.33333e-06	100.73	R
P058_G3.9	37.6616	0.00207967	21.4215	0.0111137	31.9051	2.49516	4.47441	2.40396	0.0226453	0.000884667	2.66667e-06	100.398	C
P058_G3.10	37.7725	0.0204173	21.3444	-0.000528	32.0205	2.3982	4.71451	2.12194	0.022171	0.005454	0	100.42	C
P058_G3.11	37.7406	0.0103473	21.419	0.0174327	32.4402	2.11065	5.10682	1.60429	0.013771	0.00487367	1.33333e-06	100.468	Int
P058_G3.12	37.8063	0.01086	21.43	0.0336353	32.5064	1.61862	5.66401	1.19857	0.013101	0.00237733	0	100.284	Int
P058_G3.13	37.9935	-0.0158193	21.677	0.00860267	32.6327	1.31978	5.92232	1.18324	0.0253267	0.00669133	-6.66667e-07	100.753	R
P058_G3.14	37.8967	-0.03004	21.562	0.0136447	32.9336	1.39344	5.99864	0.749274	0.0227333	-0.0145033	-2e-06	100.526	R
P058_G3.15	37.8987	0.0135287	21.5306	0.0174383	32.765	1.76552	5.73791	0.871079	0.01489	0.00414533	2.66667e-06	100.619	R

## Sheet: Garnet P12060
SAMPLE	SiO2	TiO2	Al2O3	Cr2O3	FeO	MnO	MgO	CaO	Na2O	K2O	O	TOTAL	Core/rim/intermediate
P060_G1.1	38.0016	-0.00468667	21.525	0.00370667	32.2914	1.59819	4.55635	2.99554	0.00980933	0.001306	1.33333e-06	100.978	R
P060_G1.2	38.1614	0.010346	21.5087	0.030811	31.5755	1.5316	5.08555	3.00534	0.00782167	-0.00455667	1.33333e-06	100.913	Int
P060_G1.3	37.972	-0.00633633	21.4986	0.013388	31.4685	1.50461	5.17032	2.86241	0.0315063	0.000878667	1.33333e-06	100.516	Int
P060_G1.4	37.9902	-0.01053	21.4765	0.029131	31.4915	1.50621	5.18796	2.79605	0.032039	-0.00457433	1.33333e-06	100.495	C
P060_G1.5	38.0552	-0.00036	21.4392	0.00889567	31.5343	1.51295	5.20663	2.78681	0.029054	-0.000584333	1.33333e-06	100.572	C
P060_G1.6	37.9745	0.012496	21.4474	0.0212177	31.6019	1.49994	5.20293	2.80684	0.0176987	-0.00149167	4e-06	100.583	C
P060_G1.7	38.0083	0.0152277	21.4998	0.03957	31.5692	1.52011	5.12994	2.82314	0.019583	-0.000868333	0	100.624	Int
P060_G1.8	37.7493	0.0212263	21.4168	0.019517	31.6314	1.50111	4.94221	3.08284	0.016798	0.00478033	0	100.386	Int
P060_G1.9	37.831	-0.0529823	21.3775	0.0156897	32.9206	1.69447	4.19709	2.60439	0.011686	0.0165783	1.33333e-06	100.616	R
P060_G2.1	37.9156	0.00636433	21.5661	0.0111243	32.3619	1.63	4.60145	2.75529	0.0126437	-0.00171367	1.33333e-06	100.859	R
P060_G2.2	37.8233	0.015852	21.4457	-0.00167167	32.0877	1.53008	4.91857	2.72002	0.0446887	0.00254333	-2e-06	100.587	Int
P060_G2.3	37.5347	0.969297	21.2107	0.0259573	31.785	1.55488	4.85037	2.62462	0.0146163	-0.0111533	1.33333e-06	100.559	C
P060_G2.4	38.0146	-0.00306	21.3922	0.0264613	31.9557	1.56418	4.98729	2.62514	0.013553	-0.00305367	0	100.573	C
P060_G2.5	37.6939	-0.002109	21.4001	0.0107423	32.0047	1.53353	4.95494	2.64906	0.016091	0.00278433	1.33333e-06	100.264	Int
P060_G2.6	37.8064	0.008756	21.4234	0.00256533	32.418	1.62671	4.58908	2.75385	0.006498	0.000204	-3.33333e-06	100.635	R
P060_G3.1	37.845	0.00840533	21.39	0.0259023	32.716	1.64641	4.41594	2.66076	0.0178697	0.003491	2.66667e-06	100.73	R
P060_G3.2	37.7582	-0.00411867	21.3863	0.0264633	32.3947	1.58821	4.80543	2.6165	0.00507533	-0.00376367	0	100.573	Int
P060_G3.3	37.7406	0.001557	21.3202	0.0155323	32.3506	1.61025	4.71021	2.67043	0.0144143	0.000135	1.33333e-06	100.434	C
P060_G3.4	37.8498	-0.0169067	21.4414	0.01725	32.2363	1.58064	4.93072	2.6098	0.001951	-0.00417933	2.66667e-06	100.647	C
P060_G3.5	37.8269	-0.0122333	21.4473	0.003015	32.2059	1.54265	4.95029	2.67613	0.00267767	0.001175	1.33333e-06	100.644	Int
P060_G3.6	37.6947	0.00361567	21.3732	0.009717	32.6326	1.65386	4.46769	2.77142	0.00329267	0.00332833	2.66667e-06	100.613	R
P060_G4.1	37.9377	0.00308367	21.424	0.014737	32.0924	1.54303	4.69288	2.88934	0.00722367	0.00506733	0	100.609	R
P060_G4.2	37.9422	0.00285833	21.3589	0.023577	31.505	1.43081	5.13918	2.92283	0.00983633	-0.00140867	1.33333e-06	100.334	Int
P060_G4.3	37.8497	0.004604	21.4047	0.001894	31.7251	1.42837	5.17414	2.71016	0.011469	0.012926	1.33333e-06	100.323	C
P060_G4.4	37.8054	0.000974	21.4211	0.0112837	31.5734	1.42163	5.17181	2.7023	0.0224107	-0.0415633	0	100.089	C
P060_G4.5	37.9404	-0.00762833	21.3696	0.0216067	31.5339	1.42071	5.09386	3.08536	0.00461033	-0.001981	0	100.46	Int
P060_G4.6	37.8394	0.0381613	21.3434	0.012944	31.5553	1.47478	4.94565	3.14106	0.0172133	0.00415367	1.33333e-06	100.372	Int
P060_G4.7	37.3845	0.00363967	21.1943	-0.011438	32.7299	1.68874	4.09965	2.84512	0.0137927	-0.001416	2.66667e-06	99.9468	R
P060_G5.1	37.6038	0.00558033	21.2961	0.019547	32.2812	1.61304	4.45142	2.8824	0.00130733	0.00352433	2.66667e-06	100.158	R
P060_G5.2	37.6122	0.0142847	21.4241	0.012521	32.3517	1.6199	4.63143	2.65057	0.006869	0.005887	1.33333e-06	100.329	Int
P060_G5.3	37.8421	0.0145037	21.3832	0.010527	32.2148	1.5733	4.83783	2.63208	0.00857567	-0.000638667	0	100.516	C
P060_G6.1	37.8504	0.018512	21.4918	0.0134117	31.9157	1.46506	5.01818	2.81298	0.0107923	-0.00213233	1.33333e-06	100.595	C
P060_G6.2	37.2612	-0.00638233	21.2316	0.0123677	32.7924	1.70903	4.02714	2.79719	0.007518	0.00914233	2.66667e-06	99.8412	R
P060_G7.1	37.8169	0.0014895	21.2727	0.0046605	31.7277	1.44912	4.97884	3.05428	0.016117	0.0004495	0	100.322	C
P060_G7.2	37.6282	0.005245	21.1222	0.008389	32.1211	1.6066	4.73762	2.82523	0.00185	0.007062	1.33333e-06	100.063	R
P060_G8.1	37.8181	0.0162337	21.301	0.0295127	31.9351	1.56201	4.94891	2.65176	0.0102967	0.000933	0	100.274	C
P060_G8.2	37.6597	-0.002622	21.3506	0.00925767	32.32	1.65399	4.36952	2.85166	0.011266	0.00369	1.33333e-06	100.227	R
P060_G9.1	37.739	0.00949267	21.3344	0.0164233	31.7131	1.49373	4.9553	2.799	0.0319103	-0.000959333	1.33333e-06	100.091	C
P060_G9.2	37.5935	0.0223153	21.2802	0.00126967	32.7431	1.71137	4.07682	2.72742	-0.004839	-0.00103533	0	100.15	R
P060_G10.1	37.7355	0.0257577	21.2976	0.019354	31.8694	1.54245	4.82838	2.67021	0.00971833	-0.003616	2.66667e-06	99.9949	C
P060_G10.2	37.6407	0.00796	21.3544	0.0121443	32.3707	1.66121	4.28329	2.89507	-0.002507	-0.00113767	1.33333e-06	100.222	R

## Sheet: Biotite P12055
SAMPLE	SiO2	TiO2	Al2O3	Cr2O3	FeO	MnO	MgO	CaO	BaO	Na2O	K2O	F	O	TOTAL	Core/Rim	Position
P055_B1	35.8192	2.37212	17.7065	0.039554	17.6518	0.0538917	10.8075	0.0137277	0.0759073	0.208707	9.51192	0.321897	2.66667e-06	94.5828	C	Bt layer
P055_B2	35.4714	2.39872	17.5938	0.0598465	17.6534	0.044526	10.9184	0.0177311	0.051262	0.233301	9.25511	0.408974	4e-06	94.1065	C	Bt layer
P055_B3	35.545	2.42394	17.4605	0.043601	17.9274	0.0618583	10.7994	0.00465911	0.0836837	0.21097	9.17045	0.367162	2.66667e-06	94.0986	C	Bt layer
P055_B4	35.0399	3.06735	17.4012	0.046046	17.0257	0.062554	10.6406	-0.00132077	-0.00853	0.155947	9.06868	0.327905	0	92.8261	R	Bt layer
P055_B5	35.2753	2.50625	17.5634	0.021881	17.6052	0.053272	10.7892	0.0097257	0.072095	0.234847	9.17281	0.335374	1.33333e-06	93.6394	C	Island
P055_B6	35.3337	2.38371	17.474	0.05788	17.6215	0.0386107	10.7528	0.0150409	0.0764037	0.19023	9.10454	0.356795	1.33333e-06	93.4052	C	Next to Grt
P055_B7	35.0068	2.33941	17.3017	0.0281945	18.2791	0.116271	10.5486	0.0444052	0.111935	0.234811	9.05298	0.249471	4e-06	93.3136	C	Contact wt Grt
P055_B8	35.2014	2.35027	17.3649	0.0216757	18.2068	0.091807	10.7867	-0.0123656	0.00236467	0.173147	9.14515	0.367921	6.66667e-07	93.6998	C	Contact wt Grt
P055_B9	35.4371	2.35084	17.2918	0.027334	17.984	0.0908157	10.7545	0.0116615	0.015411	0.177717	9.11317	0.343197	2.66667e-06	93.5974	C	Island
P055_B10	35.5603	2.30253	17.651	0.015812	17.2806	0.0713733	10.8495	0.00862141	0.0679873	0.192768	9.25227	0.411228	2.66667e-06	93.664	R	Island
P055_B11	35.0605	2.46676	17.3698	0.0480173	17.949	0.063733	10.7785	0.0312774	0.104772	0.227005	9.21833	0.323823	1.33333e-06	93.6416	R	Island
P055_B12	35.4677	2.28431	17.7535	0.0295633	17.4303	0.0524987	10.8719	0.00323473	0.0691887	0.201035	9.16505	0.408067	1.33333e-06	93.7363	R	Next to Grt
P055_B13	35.5812	2.68168	17.3557	0.037903	17.8179	0.0465527	10.8519	0.0182362	0.083392	0.193019	9.13993	0.413072	0	94.2205	C	Island
P055_B14	35.1625	2.54462	17.3233	0.004228	17.8895	0.0598457	10.7484	0.0044691	0.0490253	0.200123	9.2579	0.273094	2.66667e-06	93.517	C	Island
P055_B15	35.1863	2.50761	17.3259	0.0425503	17.805	0.0642877	10.7965	0.00590705	0.0544607	0.203786	9.28504	0.360042	0	93.6374	C	Island
P055_B16	35.0419	2.75286	17.1695	0.0327783	18.1982	0.0800907	10.427	0.0454762	0.020663	0.190714	9.1803	0.296026	6.66667e-07	93.4355	R	Island
P055_B17	35.4211	2.22353	17.6724	0.032713	17.8749	0.0749417	10.831	0.0217752	0.0294623	0.210965	9.26957	0.448833	2.66667e-06	94.1112	C	Island
P055_B18	35.3194	2.37275	17.5484	0.0444347	17.6676	0.0554887	10.7462	0.0145205	0.078241	0.212581	9.20079	0.420954	2.66667e-06	93.6814	C	Island
P055_B19	35.4326	2.6181	17.8673	0.043382	16.9563	0.0368953	10.5212	-0.00258129	0.0888283	0.179639	9.39408	0.348533	1.33333e-06	93.4843	R	Island
					0
Total Avg	35.3349	2.47091	17.4839	0.0356524	17.7276	0.0641744	10.7484	0.013379	0.0592923	0.201648	9.20832	0.356967	1.82456e-06	93.7052
Total Avg excluding Grt Cntct	35.3621	2.48574	17.5016	0.0369132	17.6669	0.0594845	10.7579	0.0130683	0.0595443	0.201374	9.22117	0.362646	1.76471e-06	93.7285
Contact Avg	35.1041	2.34484	17.3333	0.0249351	18.2429	0.104039	10.6676	0.0160198	0.0571498	0.203979	9.09907	0.308696	2.33333e-06	93.5067
Core Avg	35.4138	2.43325	17.4832	0.0374478	17.7725	0.0585537	10.7996	0.0124958	0.0608495	0.206931	9.22557	0.368127	2.06061e-06	93.8725
Rim Avg	35.2671	2.58199	17.5354	0.0359332	17.4733	0.0611908	10.6815	0.0141179	0.0571516	0.191185	9.21312	0.352597	1.22222e-06	93.4646
Bt layer Avg	35.6119	2.39826	17.5869	0.0476672	17.7442	0.0534253	10.8418	0.0120393	0.0702843	0.217659	9.31249	0.366011	3.11111e-06	94.2626
Next to Grt Avg	35.3337	2.38371	17.474	0.05788	17.6215	0.0386107	10.7528	0.0150409	0.0764037	0.19023	9.10454	0.356795	1.33333e-06	93.4052
Island Avg	35.3513	2.44684	17.4196	0.0315272	17.8398	0.065322	10.7881	0.0127616	0.0516654	0.199699	9.21107	0.376532	1.77778e-06	93.7941

## Sheet: Biotite P12058
SAMPLE	SiO2	TiO2	Al2O3	Cr2O3	FeO	MnO	MgO	CaO	BaO	Na2O	K2O	F	O	TOTAL	Core/Rim	Position
P058_B1	36.187	2.44995	18.065	0.057012	16.3276	0.0393455	11.7072	0.0196901	0.105313	0.375575	8.64268	0.227886	0	94.2043	C	Bt layer
P058_B2	36.2894	2.72644	17.8923	0.0363	16.3498	0.0433267	11.4435	0.0118323	0.172699	0.36464	8.68472	0.195543	0	94.2105	C	Shielded Bt layer
P058_B4	36.1673	2.53309	17.9538	0.0309653	16.3371	0.0468147	11.5517	0.104189	0.139211	0.393755	8.44048	0.338203	0	94.0366	C	Bt layer
P058_B5	36.0215	2.18478	18.1814	0.091338	16.892	0.0738885	11.1843	0.0474521	0.108026	0.353971	8.73916	0.160867	-3e-06	94.0387	C	Shielded Bt layer
P058_B6	36.3416	2.48373	17.8913	0.03169	16.444	0.021617	11.6673	0.00290565	0.160597	0.373806	8.7043	0.157676	0	94.2805	C	Bt layer
P058_B7	36.0158	2.76597	17.7167	0.083048	16.4479	0.0685433	11.4026	0.0121347	0.073069	0.365633	8.63775	0.216832	0	93.8059	C	Bt layer
P058_B8	35.692	2.82827	17.3607	0.017893	16.821	0.051554	11.7149	0.0469815	0.066802	0.388779	8.62837	0.240106	4e-06	93.8574	C	Shielded Bt layer
P058_B9	36.3074	2.7272	17.7884	0.0571625	16.2902	0.0587365	11.4357	0.0635471	0.086843	0.375196	8.82083	0.130228	0	94.1415	C	Bt layer
P058_B10	35.9825	2.73724	18.1456	0.0312035	16.2636	0.071094	11.2507	0.04041	0.0869215	0.408532	8.65002	0.143051	2e-06	93.8109	C	Island
P058_B11	36.188	2.42698	17.8501	0.025824	15.844	0.0561043	11.9159	0.0164529	0.0940293	0.378263	8.67397	0.242702	-6.66667e-07	93.7122	C	Island
P058_B12	36.2535	2.71448	18.068	0.0328403	15.5679	0.0621147	11.9636	-0.00208008	-0.0583577	0.409093	8.78764	0.25908	-2e-06	94.0579	C	Island
P058_B13	36.4548	2.40747	18.1366	-0.008555	15.7111	0.0766305	11.6977	0.0507475	0.0774375	0.378196	8.59871	0.279282	-5e-06	93.8603	C	Next to Grt
P058_B14	36.3456	2.58358	17.8773	0.083732	16.2532	0.076348	11.8113	0.0640111	0.151504	0.500088	8.60279	0.319377	0	94.6688	C	Next to Grt
P058_B15	35.8632	2.26419	18.148	-0.0006255	16.3003	0.050675	11.6181	0.0595907	0.123638	0.367618	8.60059	0.26745	2e-06	93.6627	C	Contact wt Grt
P058_B16	35.8677	2.209	17.9963	-0.02846	16.4257	0.105012	11.6037	0.0437618	0.140915	0.455138	8.53132	0.222962	4e-06	93.573	C	Contact wt Grt
P058_B17	36.3862	2.66544	17.9314	0.0588927	16.2821	0.0456493	11.5343	0.0211249	0.125835	0.364868	8.75265	0.207075	0	94.3756	R	Bt layer
P058_B18	35.7723	2.43809	18.2427	0.055572	16.541	0.0496913	11.4586	0.0026179	0.121314	0.323521	8.55605	0.268667	2.66667e-06	93.8302	R	Bt layer
P058_B19	36.0833	2.73741	17.92	0.0232577	15.4186	0.0553873	12.1037	-0.00717544	0.112037	0.40389	8.68991	0.193017	1.33333e-06	93.7334	R	Island
Total Avg	36.1233	2.54907	17.9537	0.0377273	16.2509	0.058474	11.6147	0.033233	0.10488	0.387809	8.65233	0.226111	2.96296e-07	93.9922
Total Avg excluding Grt Cntct	36.1555	2.58813	17.9388	0.044261	16.2369	0.0560529	11.6152	0.0309276	0.101455	0.384863	8.66313	0.223725	-4.16667e-08	94.039
Contact Avg	35.8655	2.2366	18.0722	-0.0145428	16.363	0.0778435	11.6109	0.0516762	0.132277	0.411378	8.56595	0.245206	3e-06	93.6179
Core Avg	36.1728	2.58224	17.9175	0.0438811	16.273	0.0573937	11.5959	0.0367903	0.0972381	0.389656	8.66242	0.22391	-3.58974e-07	94.0527
Rim Avg	36.0806	2.61364	18.0314	0.0459074	16.0806	0.0502427	11.6989	0.00552245	0.119729	0.364093	8.66621	0.22292	1.33333e-06	93.9797
Bt layer Avg	36.2038	2.59199	17.883	0.0519756	16.3694	0.0470114	11.5529	0.0404932	0.113006	0.376793	8.64921	0.214165	0	94.0937
Sheilded Bt Avg	36.001	2.57983	17.8115	0.0485103	16.6876	0.0562564	11.4476	0.035422	0.115843	0.36913	8.68408	0.198839	3.33333e-07	94.0355
Next to Grt Avg	36.4002	2.49553	18.007	0.0375885	15.9822	0.0764893	11.7545	0.0573793	0.114471	0.439142	8.60075	0.29933	-2.5e-06	94.2645
Island Avg	36.1413	2.62623	18.0212	0.0299559	15.8918	0.0631043	11.7101	0.018261	0.0408644	0.398629	8.70388	0.214944	-2.22222e-07	93.8603

## Sheet: Biotite P12060
SAMPLE	SiO2	TiO2	Al2O3	Cr2O3	FeO	MnO	MgO	CaO	BaO	Na2O	K2O	F	O	TOTAL	Core/Rim	Position
P060_B1	35.9917	2.48444	17.3235	0.0326335	16.7677	0.075812	11.4902	0.00971726	0.347913	0.231978	8.61096	0.362422	0	93.7291	C	Island
P060_B3	36.1022	2.08304	17.6185	0.050628	17.0225	0.095028	11.4177	0.0714437	0.325425	0.267922	8.85795	0.206539	8e-06	94.1189	C	Island
P060_B5	36.1187	1.9047	17.718	0.02796	17.0302	0.030486	11.7813	0.0223773	0.286184	0.234347	8.51298	0.264487	0	93.9318	C	Bt Layer
P060_B6	36.4806	1.85423	17.9125	0.0455287	17.5628	0.0696773	11.1749	0.0338705	0.230626	0.245859	8.55682	0.167889	1.33333e-06	94.3353	C	Contact wt Grt
P060_B7	36.1438	1.7874	17.757	0.0375423	16.9268	0.0614337	11.6958	0.0232688	0.225692	0.2426	8.59797	0.2414	0	93.7408	C	Next to Grt
P060_B8	36.5597	2.40243	17.4168	0.019116	17.0837	0.061339	11.3677	-0.00174484	0.250803	0.254812	8.45947	0.382749	0	94.2569	C	Contact wt Grt
P060_B9	35.7907	2.4221	17.6156	0.049649	17.2078	0.047897	11.339	0.048504	0.242906	0.267126	8.30195	0.248428	2e-06	93.5817	C	Island
P060_B10	36.0727	2.16209	17.2675	0.012748	17.3838	0.04445	11.6261	0.0943729	0.280632	0.260175	8.459	0.312959	0	93.9766	R	Island
P060_B11	36.1795	1.9658	17.553	0.0420227	17.4111	0.0588547	11.3874	0.0591534	0.305456	0.256381	8.31934	0.226038	5.33333e-06	93.764	C	Island
P060_B12	36.5541	1.72389	17.5996	0.003	17.0367	0.045676	11.7708	0.103524	0.321889	0.244919	7.95393	0.333396	0	93.6914	C	Island
P060_B14	36.3169	2.19126	17.6931	0.068604	16.704	0.093817	11.7657	0.031782	0.28235	0.221016	8.44822	0.317325	4e-06	94.1341	C	Island
P060_B15	36.2182	2.19523	17.5189	0.003031	17.2195	0.0571023	11.3602	0.0283096	0.251495	0.264854	8.44033	0.199982	0	93.7571	C	Island
P060_B16	36.4411	2.01338	17.7485	0.0259657	16.9723	0.109933	11.5575	0.0468717	0.147151	0.23208	8.5042	0.253835	2.66667e-06	94.0529	R	Island
Total Avg	36.2285	2.09154	17.5956	0.0321868	17.1022	0.0655004	11.518	0.0439577	0.269117	0.248005	8.46332	0.270573	1.79487e-06	93.9285
Total Avg excluding Grt Cntct	36.1754	2.08485	17.583	0.0321622	17.062	0.065499	11.5629	0.0490295	0.274281	0.247582	8.45517	0.26971	2e-06	93.8617
Contact Avg	36.5201	2.12833	17.6646	0.0323223	17.3233	0.0655082	11.2713	0.0160628	0.240715	0.250335	8.50815	0.275319	6.66667e-07	94.2961
Core Avg	36.1573	2.08421	17.5997	0.0350078	17.0363	0.0629007	11.5565	0.0442311	0.287701	0.247905	8.44929	0.266669	2.14815e-06	93.8277
Rim Avg	36.2569	2.08774	17.508	0.0193568	17.178	0.0771913	11.5918	0.0706223	0.213891	0.246127	8.4816	0.283397	1.33333e-06	94.0147
Bt layer Avg	36.1187	1.9047	17.718	0.02796	17.0302	0.030486	11.7813	0.0223773	0.286184	0.234347	8.51298	0.264487	0	93.9318
Next to Grt Avg	36.1438	1.7874	17.757	0.0375423	16.9268	0.0614337	11.6958	0.0232688	0.225692	0.2426	8.59797	0.2414	0	93.7408
Island Avg	36.1648	2.15225	17.5603	0.0356526	17.0528	0.067741	11.5044	0.0503477	0.296776	0.250599	8.41895	0.27059	2.7619e-06	93.8252

## Sheet: Plagioclase P12055
SAMPLE	SiO2	TiO2	Al2O3	Cr2O3	FeO	MnO	MgO	CaO	BaO	Na2O	K2O	F	O	TOTAL	Core/Rim	Position
P055_P1	57.2029	-0.006515	26.1115	-0.00107333	0.038282	-0.00233667	0.0133653	7.90324	0.0354977	7.31688	0.108477	-0.0654437	1.33333e-06	98.6547	C	Island
P055_P2	58.3845	0.011678	25.5465	-0.00460111	0.0515147	0.00915278	0.00262515	7.28178	0.0401046	7.73322	0.119884	-0.0192466	4.44444e-07	99.1571	C	Island
P055_P3	61.1447	-0.018189	25.3789	-0.001065	0.030017	-0.00229067	-0.00480009	6.80322	-0.0228967	7.95298	0.140007	-0.0587567	0	101.342	C	Island
P055_P4	60.7003	-0.0264715	25.9207	-0.02739	0.0294805	-0.001425	-0.000693777	7.24995	-0.007428	7.6559	0.0909181	-0.054045	6e-06	101.53	C	Island
P055_P5	60.0901	0.032314	26.1215	-0.028095	0.01134	-0.017305	-0.0155475	7.45025	0.0469725	7.57036	0.119171	-0.053335	2e-06	101.328	C	Next to Grt
P055_P6	59.1191	-0.000665	26.7446	0.00536767	0.0349907	-0.000788333	-0.00034948	8.26421	-0.0151387	7.05911	0.102328	-0.0519	1.33333e-06	101.261	R	Next to Grt
P055_P8	60.2205	0.0344085	26.0737	-0.003219	0.031462	-0.01101	-0.00715348	7.14427	-0.089485	7.53154	0.100203	-0.00524	0	101.02	C	Next to Grt
P055_P10	59.7271	0.0182195	26.5667	-0.02026	0.0061645	0.0005395	-0.00187566	7.76195	0.0130665	7.34899	0.115913	-0.115085	0	101.422	C	Island
P055_P10	59.7271	0.0182195	26.5667	-0.02026	0.0061645	0.0005395	-0.00187566	7.76195	0.0130665	7.34899	0.116249	-0.115085	0	101.422	R	Island
P055_P12	60.2705	-0.10321	25.7058	0.027898	0.01491	-0.01318	-0.00392288	7.03011	-0.01883	7.61862	0.134688	-0.00594	4e-06	100.657	C	Island
P055_P13	59.813	0.023624	26.2366	-0.00414	0.022255	-0.0110337	-0.0158453	7.70256	-0.0284917	7.38164	0.101092	-0.0342817	-2e-06	101.187	R	Island
P055_P14	60.1863	0.0118143	25.6003	-0.00851367	0.0356543	-0.00908333	-0.00751467	7.12475	0.00643933	7.66653	0.195701	0.0383293	1.33333e-06	100.841	C	Island
P055_P15	58.9677	-0.038395	26.977	0.008994	0.0278775	0.007175	-0.00309014	8.34895	-0.0242595	7.03763	0.0813328	-0.0240475	0	101.367	R	Island
	SiO2	TiO2	Al2O3	Cr2O3	FeO	MnO	MgO	CaO	BaO	Na2O	K2O	F	O	TOTAL
Total Avg	59.658	-0.00332059	26.1193	-0.00587365	0.0261625	-0.00392661	-0.00359063	7.52517	-0.0039525	7.47865	0.117382	-0.0433905	1.11111e-06	100.861
Core Avg	59.7697	-0.00510569	25.8917	-0.00736879	0.0276472	-0.00521538	-0.00283529	7.3055	0.000382321	7.59945	0.124996	-0.0376403	1.67901e-06	100.661
Rim Avg	59.4067	0.000695875	26.6312	-0.00250958	0.0228219	-0.00102688	-0.00529016	8.01942	-0.0137058	7.20684	0.100251	-0.0563285	-1.66667e-07	101.309
Island Avg	59.6124	-0.0109225	26.0611	-0.00504111	0.026232	-0.00219426	-0.00236277	7.49684	0.000626872	7.50614	0.120426	-0.0453602	1.11111e-06	100.758
Next to Grt Avg	59.8099	0.0220192	26.3133	-0.00864878	0.0259309	-0.00970111	-0.0076835	7.61958	-0.0192171	7.387	0.107234	-0.036825	1.11111e-06	101.203

## Sheet: Plagioclase P12058
SAMPLE	SiO2	TiO2	Al2O3	Cr2O3	FeO	MnO	MgO	CaO	BaO	Na2O	K2O	F	O	TOTAL	Core/Rim	Position
P058_P1	65.4882	0.023089	20.8446	0.015799	0.014723	-0.00240467	0.00367812	1.65491	-0.021959	10.8836	0.154484	-0.0327927	1.33333e-06	99.026	C	Island (Large)
P058_P2	64.9616	-0.013179	21.4982	0.020636	0.0108775	0.00074	-0.00260067	2.07876	0.0159415	10.8749	0.0742859	-0.0545885	-3e-06	99.4656	R	Island (Large)
P058_P3	65.3858	0.028907	21.0899	-0.0146543	-0.00745633	0.00490467	-0.00467877	1.7247	0.044736	11.0489	0.125005	1.33333e-06	2.66667e-06	99.4261	C	Island (Large)
P058_P4	65.7464	0.007774	20.8647	0.02528	-0.00191	-0.00597	-0.0153696	2.06335	0.064871	10.8704	0.100288	-0.0386	0	99.6813	C	Island (Large)
P058_P5	64.5285	0.0332067	21.0088	0.00413733	-0.00213167	-0.00855	-0.00710614	2.18556	-0.000444667	10.8696	0.0825989	-0.00759333	4e-06	98.6866	R	Island (Large)
P058_P6	65.149	0.0118077	20.7799	-0.01547	-0.0134233	0.0146273	0.000211555	1.74663	0.100891	10.9904	0.150062	-0.0437667	-3.33333e-06	98.8708	C	Island (Large)
P058_P7	64.6172	0.0182135	21.0597	-0.01486	-0.0022305	-0.002858	-0.0207976	1.93347	-0.004575	11.03	0.0800203	0.0192235	0	98.7125	R	Island (Large)
P058_P8	65.1432	0.00335533	20.6188	-0.010426	0.009999	0.00605067	-0.00503881	1.52472	0.0184153	11.1642	0.127976	0.033244	2.66667e-06	98.6345	C	Island (Large)
P058_P9	65.0657	0.016006	20.8557	-0.00479033	0.0195867	-0.006683	-0.0170088	1.65564	0.0316807	11.0512	-0.0179774	-0.0403243	-3.33333e-06	98.6088	C	Next to Grt
P058_P10	64.7306	0.0372617	21.1158	-0.013743	-0.002352	0.007232	-0.00705283	1.97466	-0.0254103	10.966	0.084526	0.0138147	-2e-06	98.8814	C	Next to Grt
P058_P11	65.038	0.000464	20.785	0.013306	-0.00192	-0.01792	-0.00808242	1.76162	0.0270125	10.9599	0.133347	-0.0355	2e-06	98.6552	C	Next to Grt
P058_P12	64.9796	0.0235817	20.9123	0.0288473	0.00766167	0.010108	0.0032667	1.73803	-0.010257	11.0318	0.0819119	-0.111913	1.33333e-06	98.695	C	Next to Grt
P058_P13	64.3672	-0.00898333	21.2038	0.0286087	-0.004039	0.00453133	-0.00672313	1.99791	-0.00363733	10.8802	0.0882616	-0.0620277	1.33333e-06	98.4852	C	Island (Small)
	SiO2	TiO2	Al2O3	Cr2O3	FeO	MnO	MgO	CaO	BaO	Na2O	K2O	F	O	TOTAL
Total Avg	65.0155	0.0139619	20.9721	0.00482082	0.00210654	0.000292949	-0.00671558	1.84923	0.0182511	10.9709	0.0972915	-0.0277556	2.82051e-07	98.9099
Core Avg	65.1094	0.0143263	20.9071	0.00527573	0.00208697	0.00144763	-0.0056798	1.78422	0.0226343	10.9847	0.102788	-0.0317865	2.66667e-07	98.8964
Rim Avg	64.7024	0.0127471	21.1889	0.00330444	0.00217178	-0.003556	-0.0101681	2.06593	0.00364061	10.9248	0.0789684	-0.0143194	3.33333e-07	98.9549
Island Avg	65.2133	0.0109916	20.9003	0.00485622	-0.000351111	0.00362322	-0.00465345	1.78537	0.0338861	10.9729	0.124346	-0.0239903	7.77778e-07	99.0206
Next to Grt Avg	64.9535	0.0193283	20.9172	0.005905	0.00574408	-0.00181575	-0.00721934	1.78249	0.00575646	11.0023	0.0704518	-0.0434807	-5e-07	98.7101
Small Grain Avg	64.3672	-0.00898333	21.2038	0.0286087	-0.004039	0.00453133	-0.00672313	1.99791	-0.00363733	10.8802	0.0882616	-0.0620277	1.33333e-06	98.4852

## Sheet: Plagioclase P12060
SAMPLE	SiO2	TiO2	Al2O3	Cr2O3	FeO	MnO	MgO	CaO	BaO	Na2O	K2O	F	O	TOTAL	Core/Rim	Position
P060_P1	63.6276	-0.00412	21.9462	0.005861	0.010854	-0.03495	-0.0293801	3.00665	0.086872	10.1902	0.0827262	-0.07843	0	98.81	C	Island
P060_P2	62.208	-0.01492	22.6902	-0.01754	-0.0003165	-0.0018175	0.00490187	4.03051	0.007749	9.43043	0.0931761	0.0224795	2e-06	98.4528	R	Island
P060_P3	62.4948	0.006555	22.7875	-0.01875	0.0165823	0.0229223	-0.00880142	4.01693	-0.018964	9.56515	0.132952	-0.00381733	0	98.993	C	Next to Grt
P060_P4	61.7592	-0.0163245	22.9586	-0.016525	0.0095695	-0.0208675	-0.0103237	4.29708	0.016288	9.49282	0.0890253	-0.034564	0	98.524	R	Next to Grt
P060_P5	61.709	0.00731133	22.8422	0.01071	0.0152987	0.0102907	0.000861532	4.04839	0.0841597	9.63861	0.108137	0.0563977	0	98.5314	C	Island
P060_P6	61.8579	0.0375487	22.9975	0.0167087	0.0223097	0.0211577	-0.00931604	4.17469	0.0333193	9.55153	0.0816969	0.0175497	-3.33333e-06	98.8025	R	Island
P060_P7	62.9869	0.0257575	22.3952	0.001812	0.009881	0.00709	0.00226682	3.58843	0.0563845	9.88214	0.0969029	0.0404895	2e-06	99.0932	C	Island
P060_P8	62.0353	-0.00740067	22.6465	0.0198113	0.00319233	-0.0141517	-0.00484033	4.01078	-0.009841	9.59423	0.0942483	0.0293957	0	98.3972	C	Island
P060_P9	62.6441	-0.0209373	22.5936	-0.0171747	0.004251	0.00538467	-0.0152404	3.62457	0.0327413	9.79151	0.121287	-0.04236	0	98.7217	C	Island
P060_P10	62.6587	0.0113613	22.5123	-0.03225	0.019129	-0.004537	0.00186222	3.69169	0.0503513	9.79286	0.116066	0.0125147	1.33333e-06	98.83	C	Island
P060_P11	62.1874	-0.001461	22.5846	-0.00718	0.0204055	-0.000302	-0.00248483	3.7648	0.04508	9.87896	0.0996228	-0.002265	6e-06	98.5672	C	Island
P060_P12	61.9872	-0.01468	22.9453	0.000985	0.0142493	0.0135107	0.00695667	4.00347	0.00775233	9.72189	0.0800045	0.0203197	2.66667e-06	98.787	C	Island
P060_P13	62.5226	0.007862	22.403	0.007449	0.004684	0.005071	-0.00263001	3.58695	-0.0173363	9.88333	0.107274	-0.03352	0	98.4747	C	Island
	SiO2	TiO2	Al2O3	Cr2O3	FeO	MnO	MgO	CaO	BaO	Na2O	K2O	F	O	TOTAL
Total Avg	62.3599	0.00127326	22.6387	-0.00354482	0.0115454	0.000677026	-0.00508982	3.83423	0.028812	9.72413	0.10024	0.000322308	8.20513e-07	98.6911
Core Avg	62.4854	0.00102482	22.5656	-0.00287263	0.0118527	0.00103287	-0.00514298	3.73427	0.03172	9.79389	0.103922	-0.000127517	1.2e-06	98.7205
Rim Avg	61.9417	0.00210139	22.8821	-0.00578544	0.0105209	-0.000509111	-0.00491262	4.16743	0.0191188	9.49159	0.0879661	0.00182172	-4.44444e-07	98.5931
Island Avg	62.4843	0.000410352	22.541	-0.00110848	0.0113272	-0.0013993	-0.00473649	3.70286	0.0373515	9.8193	0.100697	0.000282463	1.33333e-06	98.6903
Next to Grt Avg	62.208	-0.01492	22.6902	-0.01754	-0.0003165	-0.0018175	0.00490187	4.03051	0.007749	9.43043	0.0931761	0.0224795	2e-06	98.4528

## Sheet: Titanite P12053
SAMPLE	Nb WT%	Si WT%	Zr WT%	Ti WT%	Al WT%	Fe WT%	Ca WT%	K WT%	O WT%	TOTAL	Core/Intermediate/Rim
P053_T1_1	0.07998	14.1905	0.005123	18.2366	3.76452	0.304656	20.5944	0.004847	39.9676	97.1482	C
P053_T1_1	0.083644	14.2624	0.006163	18.5718	3.53729	0.329979	20.5194	0.053837	40.0585	97.423	C
P053_T1_2	0.083271	14.2089	0.0094	18.8289	3.39428	0.330076	20.5663	-0.00593	40.0477	97.4629	C
P053_T1_2	0.079765	14.3068	0.006947	18.4396	3.66293	0.31856	20.4615	-0.00199	40.0924	97.3665	C
P053_T2_1	0.099899	14.3367	0.007427	18.199	3.9455	0.319149	20.833	-0.009	40.3732	98.1049	C
P053_T2_1	0.087678	14.2993	0.007094	17.4401	4.55197	0.400393	20.4652	0.002096	40.2389	97.4927	C
P053_T2_2	0.091928	14.35	0.009192	18.9709	3.46443	0.327931	20.7393	-0.00694	40.433	98.3797	R
P053_T2_2	0.098645	14.3517	0.013047	18.9533	3.42828	0.332396	20.8025	-0.0079	40.4208	98.3927	R
P053_T2_2	0.090425	14.3216	0.010892	19.3225	3.32923	0.330817	20.6189	-0.00827	40.4646	98.4807	R
P053_T3_1	0.094585	14.2581	0.007286	18.0679	3.96885	0.292818	20.6066	-0.00406	40.1136	97.4057	C
P053_T3_1	0.078807	16.7407	0.006189	16.3575	4.62361	0.264473	17.7534	1.75976	41.5959	99.1804	C
P053_T3_1	0.087895	14.3132	0.01063	18.9345	3.50971	0.328047	20.5554	0.005646	40.3313	98.0764	C
P053_T4_1	0.09049	14.2318	0.011061	18.7404	3.47837	0.337106	20.3388	0.009606	39.9993	97.237	C
P053_T5_1	0.083	14.3526	0.009466	18.3997	3.63319	0.309099	20.7084	-0.00721	40.1802	97.6685	C
P053_T5_1	0.08172	14.3259	0.01011	18.8397	3.4212	0.32401	20.5195	-0.00769	40.1807	97.6951	C
P053_T5_1	0.084802	14.2596	0.012078	18.6931	3.43	0.319725	20.4974	-0.00875	40.0067	97.2946	C
P053_T5_2	0.072849	14.2638	0.005996	18.2143	3.78335	0.287395	20.692	-0.00769	40.0689	97.3809	R
P053_T6_1	0.078653	14.3597	0.005656	18.2981	3.88963	0.299764	20.792	-0.00865	40.3733	98.0882	C
P053_T6_1	0.083204	14.341	0.008036	18.3908	3.81779	0.31228	20.7513	-0.00716	40.3391	98.0363	C
P053_T6_1	0.080182	14.3595	0.006676	18.1727	3.88053	0.297964	20.7616	-0.0083	40.2687	97.8196	C
P053_T7_1	0.073989	14.3594	0.009928	18.3972	3.70963	0.294178	20.508	-0.00554	40.1614	97.5082	C
P053_T7_1	0.085181	14.3474	0.010961	18.9014	3.40463	0.30989	20.4663	-0.00188	40.2036	97.7275	C
P053_T7_2	0.066204	14.3313	0.008584	18.5608	3.60102	0.316943	20.4461	-0.00048	40.1186	97.4491	R
P053_T8_1	0.081618	14.3306	0.006941	18.3925	3.73857	0.324322	20.5631	-0.00862	40.181	97.61	C
P053_T8_1	0.073837	14.3927	0.009846	18.2603	3.8262	0.3114	20.6771	-0.00617	40.2813	97.8265	C
P053_T8_1	0.145086	14.3687	0.005035	18.3273	3.84604	0.313501	20.5239	-0.00434	40.2841	97.8094	C
P053_T8_2	0.077816	14.3715	0.0076	18.6395	3.61288	0.309316	20.4963	-0.00302	40.246	97.7579	Int
P053_T8_2	0.080108	14.3548	0.008446	18.3902	3.7551	0.299024	20.6063	-0.0073	40.229	97.7157	Int
P053_T8_2	0.073885	14.3591	0.00628	18.1955	3.88441	0.301143	20.5494	-0.00859	40.1933	97.5544	Int
P053_T8_3	0.065162	14.3866	0.009222	18.3686	3.71304	0.310371	20.587	-0.00776	40.2012	97.6334	R
P053_T8_3	0.077686	14.364	0.008456	18.6159	3.60944	0.324795	20.5609	-0.00813	40.2452	97.7983	R
P053_T8_3	0.077722	14.3265	0.010657	18.4841	3.62814	0.310431	20.488	-0.00588	40.099	97.4186	R
P053_T9_1	0.075385	14.4212	0.006556	17.9225	4.17722	0.243754	20.7309	-0.00612	40.3979	97.9693	C
P053_T9_1	0.071656	14.4211	0.009905	19.0638	3.48836	0.306261	20.6638	-0.008	40.5306	98.5475	C
P053_T9_1	0.071686	14.5131	0.009432	18.7879	3.64349	0.319848	20.7377	-0.00703	40.6233	98.6994	C
P053_T9_2	0.078722	14.45	0.010831	18.8579	3.59042	0.302043	20.7124	-0.00608	40.5383	98.5345	R
P053_T9_2	0.066634	14.4617	0.008883	18.4415	3.82503	0.302623	20.6967	-0.00484	40.4721	98.2703	R
P053_T9_2	0.071498	14.5205	0.007304	18.2509	4.03338	0.277615	20.7736	-0.00523	40.6224	98.552	R
P053_T10_1	0.074387	14.3071	0.01077	19.1243	3.29379	0.326509	20.5149	-0.00632	40.2119	97.8573	C
P053_T10_1	0.074649	14.2741	0.008285	19.0159	3.28107	0.313846	20.5081	-0.00592	40.0835	97.5536	C
P053_T10_1	0.075461	14.3227	0.006226	18.0432	4.00178	0.278615	20.6775	-0.0078	40.1918	97.5895	C
P053_T10_2	0.068383	14.5104	0.006501	16.5272	4.90892	0.284899	20.8582	-0.00893	40.2789	97.4345	C
P053_T10_2	0.061598	14.5007	0.004892	16.6087	4.89033	0.279862	20.964	-0.00583	40.3425	97.6467	C

[truncated: 3 more sheets: Titanite P12054, Titanite P13031, Titanite P13032]
